# Supplementary material for: Early onset preeclampsia in a model for human placental trophoblast
Source: PubMed Central journal article supplement — Proc Natl Acad Sci U S A. 2019 Feb 20;116(10):4336–45. doi: 10.1073/pnas.1816150116 (PMC6410818; doi:10.1073/pnas.1816150116), 2019-02-20
Supplement: pnas.1816150116.sapp.pdf [file pnas.1816150116.sapp.pdf]

## **SI Appendix:**

### **Early onset preeclampsia in a model for human placental trophoblast**

Megan A. Sheridan<sup>a,d,h,1</sup>, Ying Yang<sup>b,d,i,1</sup>, Ashish Jain<sup>f,g</sup>, Alex S. Lyons<sup>a,d</sup>, Penghua Yang<sup>d,j</sup>, Sambasiva R. Brahma<sup>d,k</sup>, Aihua Dai<sup>d</sup>, Yuchen Tian<sup>d</sup>, Mark R. Ellersieck<sup>e</sup>, Geetu Tuteja<sup>f,g</sup>, Danny J. Schust<sup>c</sup>, Laura C. Schulz<sup>c</sup>, Toshihiko Ezashi<sup>b,d,1</sup>, R. Michael Roberts<sup>a,b,d,2</sup>

#### **Author Affiliations**

<sup>a</sup>Department of Biochemistry, <sup>b</sup>Division of Animal Sciences, <sup>c</sup>Department of Obstetrics, Gynecology and Women's Health, <sup>d</sup>Bond Life Sciences Center, <sup>e</sup>Agriculture Experiment Station, University of Missouri, Columbia, Missouri, USA. <sup>f</sup>Department of Genetics, Development, and Cell Biology, <sup>g</sup>Bioinformatics and Computational Biology, Iowa State University, Ames, Iowa, USA. <sup>h</sup>Department of Pathology, Centre for Trophoblast Research, University of Cambridge, Cambridge, United Kingdom, <sup>i</sup>Department of Molecular Pharmacology and Physiology, University of South Florida, Tampa, Florida, USA. <sup>j</sup>Department of Obstetrics, Gynecology, and Reproductive Sciences, School of Medicine, University of Maryland-Baltimore, Baltimore, Maryland, USA. <sup>k</sup>Centre for Cellular and Molecular Biology (CCMB), Hyderabad, India.

<sup>1</sup> Equal contribution

<sup>2</sup>To whom correspondence may be addressed: R. Michael Roberts, University of Missouri, 240b Bond Life Sciences Center, 1201 East Rollins Street, Columbia, MO 65211, (573) 882-0908, Email: [robertsrm@missouri.edu](mailto:robertsrm@missouri.edu).

**Running title:** Trophoblast model for early onset preeclampsia

## **SI Materials and Methods**

**Primary tissue and iPSC generation.** The approach used to provide primary cultures of mesenchymal cells from umbilical cords has been described elsewhere (1). Briefly the tissues were washed to remove blood cells and minced into fragments to deliver adherent cells by the explant method (2). Outgrowths appeared at the periphery of the minced tissues after ~one week of culture. After 10 - 11 days, the fibroblasts were passaged from the 48-well plate into T25 flasks by using TrypLE™ (Invitrogen). The cells reached confluence in the flask by ~14 days and were expanded for reprogramming to iPSC. All cultures used to provide stocks of primary cells and iPSC were performed in a tri-gas incubator set to the following conditions (5 % O<sub>2</sub>/ 5 % CO<sub>2</sub>/80 % N<sub>2</sub>).

Generation of iPSCs from umbilical cord fibroblasts with episomal vectors has also been described elsewhere (3). In brief, a protocol developed by Okita et al (4) with episomal vectors carrying shRNA for p53 suppression and non-transforming L-MYC, in addition to the usual reprogramming genes *POU5F1*, *SOX2*, *KLF4* and *LIN-28*, was employed to reprogram the fibroblasts. Three micrograms of the developed Y4 combination (*POU5F1*, *SOX2*, *KLF4*, *LIN28*, *L-MYC* and *p53 shRNA*) of the episomal plasmids was electroporated with a Nucleofector II device (Lonza, Basel, Switzerland) and Amaxa NHDF Nucleofector kit (Lonza) into the CTL and EOPE fibroblast cells collected from umbilical cords according to the manufacturer's instructions. After 2-4 days of recovery, cells were placed into 100 mm dishes previously coated with Matrigel (BD Bioscience, San Jose, CA). The following day the culture medium was switched to mTeSR1 (StemCell Technologies, Vancouver, Canada). Colonies resembling human ESC were mechanically isolated (around day 20 of culture) and expanded. A total of 10 CTL iPSC and 19 EOPE iPSC lines were established.

**RNA extraction and processing.** RNA was extracted from each of the primary fibroblast cultures and the respectively generated iPSC lines (cultured under both O<sub>2</sub> concentrations: 4 and 20 %) in STAT60 (Tel-

Test) and further purified according to the manufacturer's instructions. RNA samples were submitted to the University of Texas Southwestern Medical Center Microarray Core Facility (<https://microarray.swmed.edu/>), and microarray analysis was performed with Illumina HumanHT-12 v4 expression BeadChips. This analysis used the entire 47,159 probes on the BeadChip. Raw intensity data were background-subtracted by using BeadStudio software to generate transcriptomes for each of the cell lines (GeneSpring 12.6 software; Agilent Technologies, Inc.). A raw intensity was then assigned to each gene by taking the average intensity of all probes corresponding to a gene. The raw intensities were normalized by using the quantile normalization method. Principal component analysis was then applied to the top quartile of protein coding genes (4,186 genes) based on the variance across samples in order to provide an unsupervised clustering and visualization approach to the data. Transcriptome data from the gene expression arrays were also used to evaluate pluripotency of the hESC and iPSC lines by using the Pluritest (5) (<https://pluritest.org/>).

**Cell culture and differentiation.** Human ESC (H1/WA01 and H9/WA09) and iPSC were cultured in six-well tissue culture plates (Thermo Scientific) coated with Matrigel (BD Bioscience) under an atmosphere of 5 % CO<sub>2</sub>/air at 37°C in mTeSR1 medium (STEMCELL Technologies). Cells were passaged every 5–6 days. Briefly, colonies were exposed to dispase (1 mg/ml) (STEMCELL Technologies) for 5-7 min at 37 °C and then were broken into small clumps with the Stempro EZpassage (ThermoFisher) cutting tool. The method for TB differentiation has been described elsewhere with slight modifications (6). Briefly, cells were passaged onto Matrigel coated dishes into DME/F12 medium (Thermo Scientific) with knock-out serum replacement (KOSR, Invitrogen) that had been conditioned by mouse embryonic fibroblasts for 24 h (MEF-CM) and supplemented with FGF2 (4 ng/ml). After 24 h, the conditioned medium was replaced with daily changes of non-conditioned DME/F12/KOSR medium lacking FGF2 (hESC medium), but containing BMP4 (10 ng/ml), A83-01 (1 μM) and PD173074 (0.1 μM) (BAP treatment) for up to 6 days. These medium changes exposed the culture wells to ambient O<sub>2</sub> conditions for a maximum of 5-6 min to

minimize re-oxygenation of the low O<sub>2</sub> cultures. CTL cultures (undifferentiated) were maintained in MEF-CM containing 4 ng/ml FGF2. After 6 days of BAP treatment, spent medium was collected for immunoassays, total DNA was isolated to determine cell density by using the Wizard<sup>®</sup> Genomic DNA purification kit (Promega, A2360), and total RNA isolated (STAT60, Tel-Test Inc.) for RNA sequencing.

***Measurement of dissolved oxygen in culture media.*** All measurements were conducted in Columbia, MO which is at an altitude of 274 meters (= 898 ft.). Two 37° C incubators, one a standard CO<sub>2</sub> incubator (NuAire) set to provide 5% CO<sub>2</sub> in air, and a mixed gas O<sub>2</sub>/CO<sub>2</sub> incubator (HERAcell150) set to provide 4 % O<sub>2</sub> were used for the dissolved oxygen measurements. Actual CO<sub>2</sub> and O<sub>2</sub> levels of the incubators were monitored with a Bacharach CO<sub>2</sub>/O<sub>2</sub> Analyzer (Bacharach, Model 2830, New Kensington, PA), which was calibrated according to the manufacturer's instructions to 20.9% atmospheric oxygen before each measurement. The measured O<sub>2</sub> concentrations were ~19% in the standard incubator and varied between 3.5–4.5% in the low O<sub>2</sub> incubators. The dissolved O<sub>2</sub> concentrations in media were assessed by using an oxygen polarographic electrode, Pinpoint II O<sub>2</sub> Meter (Aquatic Eco-Systems, Inc, Apopka, FL), which provides units in mg of gas per liter of water, i.e. equivalent to parts per million = ppm. The device offsets the effects of temperature from 0 to 50°C (32-122°F) with an accuracy of ± 0.2 ppm. The experiments were carried out by placing 15 ml of medium in either a T25 vented-lid culture flask or by using 15 ml distributed equally among the wells of a 6-well plate (2.5 ml medium/well). At the end of the test equilibration period, the medium (15 ml) was collected into a 50 ml tube and the electrode inserted to a one-inch depth. The medium was gently agitated during the measurements. Values in some experiments were validated by placing the media samples in gas-tight syringes and measuring the partial pressure of O<sub>2</sub> with an IRMA SL Blood Analysis System. Both methods provided comparable values. Also, values obtained from the 6-well and T25 culture dishes were not significantly different.

**Perfusion/reperfusion rates for dissolved O<sub>2</sub>.** When culture dishes or invasion chambers are taken out of the low O<sub>2</sub> incubator for medium changes or other manipulations, there is reperfusion of atmospheric O<sub>2</sub>, with resulting fluctuations in culture conditions. The dissolved O<sub>2</sub> concentration of the culture medium held in 91 % N<sub>2</sub>/5 % CO<sub>2</sub>/ 4 % O<sub>2</sub> was ~3.5 ppm at equilibrium, while it was ~7.8 ppm in air/5 % CO<sub>2</sub> (SI Appendix, Fig. S1A). This translates to partial O<sub>2</sub> pressures of O<sub>2</sub> of 58 mm Hg and 159 mm Hg, respectively. It required ~3h to reach equilibration when the medium was transferred from air/5 % CO<sub>2</sub> to the low O<sub>2</sub> conditions, with an ET50 (exposure time for 50 % equilibration) of ~40 min (SI Appendix, Fig. S1A). Conversely, medium equilibrated under the low (4 %) O<sub>2</sub> condition required ~100 min to reach equilibrium when transferred to 20 % O<sub>2</sub>, with an ET50 of 28 min (SI Appendix, Fig. S1B). Thus, partial re-oxygenation of low O<sub>2</sub> cultures cannot be avoided but can be minimized by controlling the exposure time outside incubators and always using medium pre-equilibrated to the designated O<sub>2</sub> condition. For example, “refeeding” colonies can be performed in around 5 min, although passaging can take up to 20 min.

### ***Invasion assay protocol:***

#### ***A. Preparation of the invasion chambers:***

1. BD BioCoat Matrigel Invasion Chambers from BD Biosciences are filled (2 ml bottom chamber, 2 ml top chamber) with pre-equilibrated culture medium (DMEM/F-12) for 2 h in incubators calibrated to provide the desired gas atmosphere (air/5 % CO<sub>2</sub> or 5 % O<sub>2</sub>/5 % CO<sub>2</sub>/90 % N<sub>2</sub>).
2. After 2 h, aspirate the DMEM/F-12 and fill the wells with pre-equilibrated MEF-CM+ FGF2 (4 ng/ml)

#### ***B. Cell culture preparation***

1. The iPSC cultures were routinely cultured on mTeSR medium as previously described (6).
2. Prior to conducting invasion assays, the selected cell lines were maintained for at least two passages in respective oxygen condition (air/5 % CO<sub>2</sub> and in 5 % O<sub>2</sub>/5 % CO<sub>2</sub>/90 % N<sub>2</sub>) on mTeSR1.

3. Prior to transfer to invasion chambers, the attached 6-day undifferentiated ESC/iPSC colonies cultured in 6-well culture dishes are rinsed twice in DMEM/F-12, Dispase solution (1 mg/ml; 1 ml) added and incubated with the colonies for ~7 min at 37 ° C. Incubation times vary for each cell line but are typically shorter for colonies cultured in 5% versus 20% O<sub>2</sub>. For example, 5-6 min for 5% O<sub>2</sub> cultures is usually long enough before colonies begin to peel off the substratum.
4. Dispase was removed and colonies gently rinsed twice in DMEM/F-12, before addition of 1 ml hESC medium conditioned by irradiated mouse embryonic fibroblasts (iMEF-CM) containing FGF2. Colonies were cut by using the Stempro EZpassage cutting tool.
5. Cells were collected by using a glass pipette, removing only the equally sized squares cut by the tool. A small aliquot (50 µl) was taken from the dissociated squares and placed in another tube before pipetting multiple times with the 200 µl tip on the pipet to break up the squares into single cells. The number of dispersed cells was counted with an automated cell counter (TC20, BioRad).
6. The suspension was shaken thoroughly. An aliquot of 5 x 10<sup>4</sup> cells (approx. 500 squares) was immediately removed and added to the upper compartment of each invasion chamber. There were six cultures (3 CTL and 3 BAP exposed) for each cell line. The suspension was shaken each time before the addition of further aliquots into the top chambers of additional wells. Then the plate was agitated several times from side to side (not by swirling) as it was placed in the incubator, to distribute the cell clumps evenly across the Matrigel-coated membrane. This step is particularly important to obtain reliable outcomes.
7. After 24 h from initial plating, the medium was changed (2 ml in each chamber) to the desired treatments (iMEF-CM+FGF2 for undifferentiated CTL cultures, BAP for differentiation).
8. The medium was then changed daily for an additional 5 days. On the sixth day (7 days after initial plating, see the table below), the cells were gently washed (2 X) by placing PBS in both

| Treatment | Day -1<br>(day of plating) | Day 0<br>(initiate differentiation) | Day 1   | Day 2   | Day 3   | Day 4   | Day 5   | Day 6     |
|-----------|----------------------------|-------------------------------------|---------|---------|---------|---------|---------|-----------|
| Control   | CM+FGF2                    | CM+FGF2                             | CM+FGF2 | CM+FGF2 | CM+FGF2 | CM+FGF2 | CM+FGF2 | Fix cells |
| BAP       | CM+FGF2                    | BAP                                 | BAP     | BAP     | BAP     | BAP     | BAP     | Fix cells |

chambers. Rough handling was avoided so that colonies would not begin to peel from the membrane. The cells on the lower surface of the membrane were then fixed by adding 1 ml of 4 % (w/v) paraformaldehyde (PFA) to the lower chamber for 12 min. At this stage, the upper surface of the membrane was viewed and an image prepared to record whether colonies were

distributed relatively evenly across the membrane and to ensure that colony peeling had not occurred.

9. The PFA was removed, and both sides of the membrane washed twice with PBS. The cells were then stained with DAPI (diluted in PBS, 1:750). At this stage the upper surface of the membrane was re-imaged to document the overall cell density of each well.
10. The cells on the top of the invasion chamber were then removed with a cotton swab and washed with PBS. This process was continued until all cells are removed. The membrane was then cut from the chamber by using a scalpel and mounted on a glass coverslip.
11. Each membrane was then imaged by taking 12 images per membrane (SI Appendix, Fig. S2) at either 4 x or 10 x magnification and the number of nuclei counted by means of Image J software.

**Immunoassays.** After 6 days of BAP treatment, spent culture medium was collected to measure hormone and growth factor levels. Total DNA was isolated (Promega, #A2360) from the respective cultures in order to normalize immunoassay results to cell density levels. ELISAs were performed by following the protocols recommended by the manufacturers. The subsequent immunoassays were used: hCG (human chorionic gonadotrophin) (Genway bio, GWB-BQK0F2), PGF (human placental growth factor; ThermoFisher, EHPGF), P4 (progesterone; Genway bio, GWB-BQK0FC), and human VEGF-R1 (sFLT1; ThermoFisher, BMS268-3). Samples were collected in three independent experiments for each cell line under both O<sub>2</sub> conditions.

**Statistical procedures.** For the invasion assays, data were log transformed due to variance between lines. Then, a Glimmix Procedure was carried out in a 2x2x2 factorial design accounting for sex, disease and treatment as variables. The ELISA data were first normalized to the respective DNA content of the culture. Two-way comparisons were made with the Student's t-test; multiple group comparisons were made by one-way ANOVA followed by Tukey's multiple comparison test (GraphPad PRISM software; GraphPad Software Inc, La Jolla, CA).

**Illumina TruSeq RNA library preparation and sequencing.** High-throughput sequencing was performed at the University of Missouri DNA Core Facility. Libraries were constructed following the manufacturer's protocol with reagents supplied in Illumina's TruSeq mRNA stranded sample preparation kit. Briefly, the poly-A containing mRNA is purified from total RNA, the RNA was fragmented, double-stranded cDNA generated from fragmented RNA, and the index containing adapters ligated to the ends. The amplified

cdNA constructs were purified by addition of Axyprep Mag PCR Clean-up beads (Fischer Scientific). The final construct of each purified library was evaluated by using the Fragment Analyzer automated electrophoresis system, quantified with the Qubit fluorometer in conjunction with the Qubit HS dsDNA assay kit, and diluted according to Illumina's standard sequencing protocol for sequencing on the NextSeq 500. Raw read counts for each of the 48 DNA samples analyzed are listed in SI Appendix, Table S3. The reads were aligned to the reference human genome (hg19) by using the program HISAT2 (<https://ccb.jhu.edu/software/hisat2>) (7) an overall alignment of >97 % was achieved in all samples (SI Appendix, Table S3). The reads aligned to genes were further counted by using htseq-count tool from HTseq software package (8). The raw read counts for each biological replicate were normalized by gene length and then by the sequencing depth to calculate the transcripts per million (TPM) (9). The TPM values were then log-transformed for further analysis.

**Differential expression analysis.** EdgeR was used for differential expression analysis (10, 11). The reads were normalized by using the trimmed mean of M-values (TMM) normalization method (12). The differentially expressed genes (DEG) were defined as the genes with an absolute fold-change  $\geq 1.5$  and adjusted p-value  $\leq 0.05$ .

**Functional enrichment analysis.** Functional enrichment analysis of gene sets was carried out by using the Genomic Regions Enrichment of Annotations Tool (GREAT) (12). The GO Biological Process and Disease Ontology were used for enrichment analysis using the hypergeometric statistic. The ontology terms with an FDR  $\leq 0.05$  and a fold-change  $\geq 2$  were considered significant.

**Weighted co-expression network analysis.** Weighted correlation network analysis (WGCNA) (13) was used to construct a co-expression network from the gene expression data from CTL and EOPE samples. The data from the invasion assays were used to calculate the correlation between co-expressed gene modules and invasion cell counts. The oxygen treatment, disease group information, and sex were also incorporated into the evaluation. Analysis was carried out as described previously (14) with minor modifications. Genes that had an expression level lower than 1 across all samples were removed from the analyses. Then, the top quartile of genes based on variance were selected. After that, the adjacency matrix for the selected genes was calculated by means of the signed hybrid Pearson correlation method with a soft thresholding power. The power was used to make a scale-free network ( $R^2 = 0.8$ ) that retains a good number of connections. The adjacency matrix was then used to calculate the interconnectedness score (topological overlap) that was used to bundle the genes by hierarchical clustering. The hierarchical tree was further cut into gene modules by using the dynamic tree cut tool. Closely related gene clusters



(Correlation > 0.75) were merged together to obtain the final gene modules (15). The identified gene modules were decomposed such that each module was represented by its weighted expression (module eigengene) in the form of its first principal component. The correlation between the gene expression and the module eigengene defined as module membership ( $K_{ME}$ ) was also calculated for each gene. Based on the  $K_{ME}$ , the genes were assigned to modules with the correlation value greater than 0.75, thereby allowing a gene to be a part of multiple modules or multiple regulatory pathways. The significance of the association between the module and different features, including invasion cell count and oxygen treatment, was also estimated by calculating the correlation between the module eigengene and the corresponding feature.

1. Yang P, *et al.* (2014) Abnormal oxidative stress responses in fibroblasts from preeclampsia infants. *PLoS one* 9(7):e103110.
2. Ishige I, *et al.* (2009) Comparison of mesenchymal stem cells derived from arterial, venous, and Wharton's jelly explants of human umbilical cord. *Int J Hematol* 90(2):261-269.
3. Lee K, *et al.* (2014) Engraftment of human iPS cells and allogeneic porcine cells into pigs with inactivated RAG2 and accompanying severe combined immunodeficiency. *Proceedings of the National Academy of Sciences of the United States of America* 111(20):7260-7265.
4. Okita K, *et al.* (2011) A more efficient method to generate integration-free human iPS cells. *Nature methods* 8(5):409-412.
5. Muller FJ, *et al.* (2011) A bioinformatic assay for pluripotency in human cells. *Nature methods* 8(4):315-317.
6. Amita M, *et al.* (2013) Complete and unidirectional conversion of human embryonic stem cells to trophoblast by BMP4. *Proceedings of the National Academy of Sciences of the United States of America* 110(13):E1212-1221.
7. Kim D, Langmead B, & Salzberg SL (2015) HISAT: a fast spliced aligner with low memory requirements. *Nature methods* 12(4):357-360.
8. Anders S, Pyl PT, & Huber W (2015) HTSeq--a Python framework to work with high-throughput sequencing data. *Bioinformatics* 31(2):166-169.
9. Li B & Dewey CN (2011) RSEM: accurate transcript quantification from RNA-Seq data with or without a reference genome. *BMC bioinformatics* 12:323.
10. McCarthy DJ, Chen Y, & Smyth GK (2012) Differential expression analysis of multifactor RNA-Seq experiments with respect to biological variation. *Nucleic acids research* 40(10):4288-4297.
11. Robinson MD, McCarthy DJ, & Smyth GK (2010) edgeR: a Bioconductor package for differential expression analysis of digital gene expression data. *Bioinformatics* 26(1):139-140.
12. Robinson MD & Oshlack A (2010) A scaling normalization method for differential expression analysis of RNA-seq data. *Genome biology* 11(3):R25.
13. Langfelder P & Horvath S (2008) WGCNA: an R package for weighted correlation network analysis. *BMC bioinformatics* 9:559.
14. Jain A, Ezashi T, Roberts RM, & Tuteja G (2017) Deciphering transcriptional regulation in human embryonic stem cells specified towards a trophoblast fate. *Scientific reports* 7(1):17257.
15. Langfelder P, Zhang B, & Horvath S (2008) Defining clusters from a hierarchical cluster tree: the Dynamic Tree Cut package for R. *Bioinformatics* 24(5):719-720.



## SI Appendix, Figures

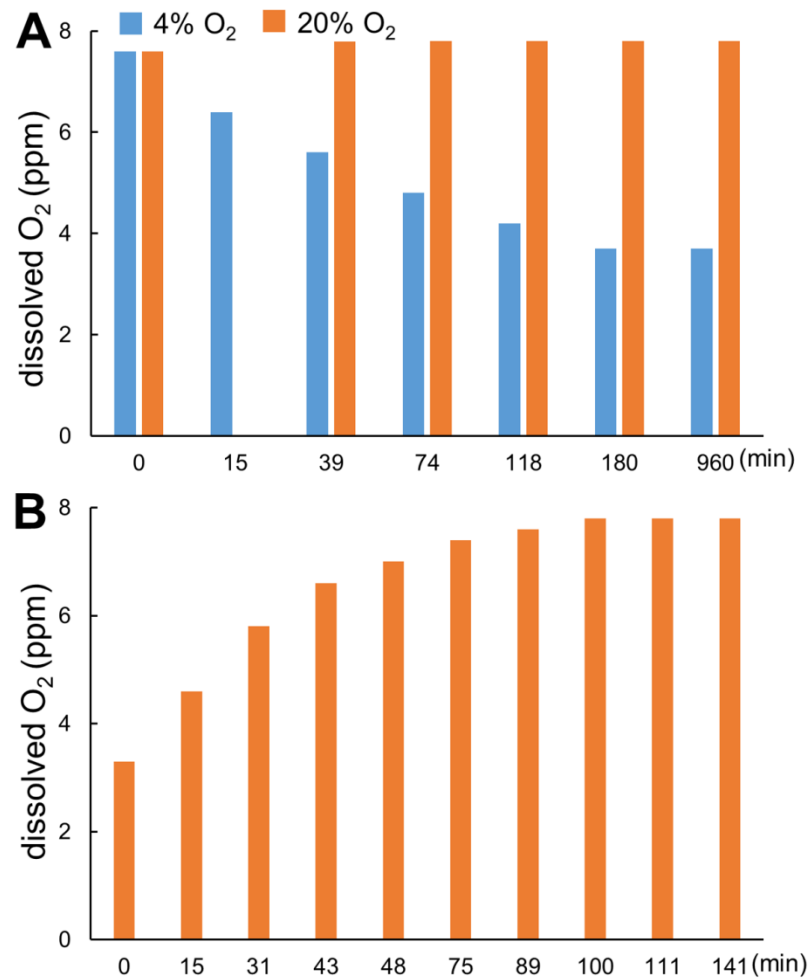

**Fig. S1:** Equilibration of O<sub>2</sub> levels in culture medium in 6-well culture plates. (A) Initial O<sub>2</sub> concentration in the medium held under standard O<sub>2</sub> conditions measured 7.8 ppm. Upon transfer to 4 % O<sub>2</sub>, levels decreased to 5.6 ppm after 39 min and reached equilibrium (3.7 ppm) after 3 h. (B) The O<sub>2</sub> concentration under 4 % O<sub>2</sub> conditions was measured at 3.3 ppm. Upon transfer to air/5 % CO<sub>2</sub>, O<sub>2</sub> levels in the medium increased to 5.8 ppm in the first 31 min and to 7.8 ppm after 100 min.

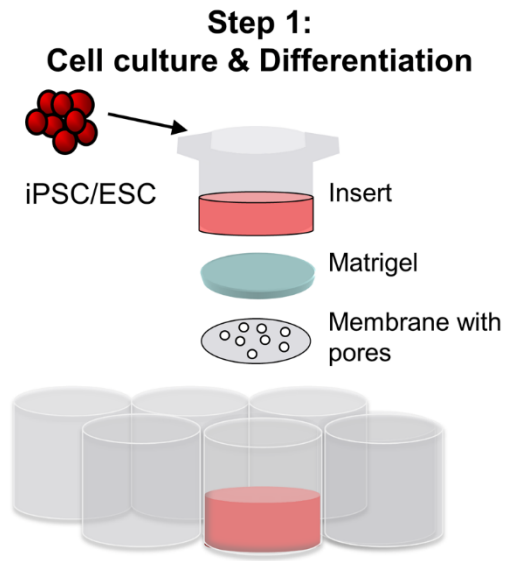

Each invasion assay on a particular cell line is performed in triplicate. Each experiment is performed X 3 (pseudo biological replicates).

**Step 2:  
Processing**

Cells are fixed after 6 days of differentiation (BAP treatment) and the cells on the top of the membrane are scrapped off.

The membranes are then mounted on slides.

**Step 3:  
Imaging & Quantification**

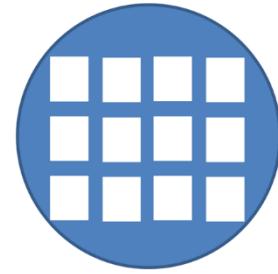

Each slide is imaged (DAPI) in 12 fields and then cells are counted by image J software.

For each cell line: 9 total slides for each O<sub>2</sub> condition (5 and 20 %)

i.e. 216 images to process per cell line.

**Fig. S2.** Cartoon summarizing the methods used in the invasion experiments

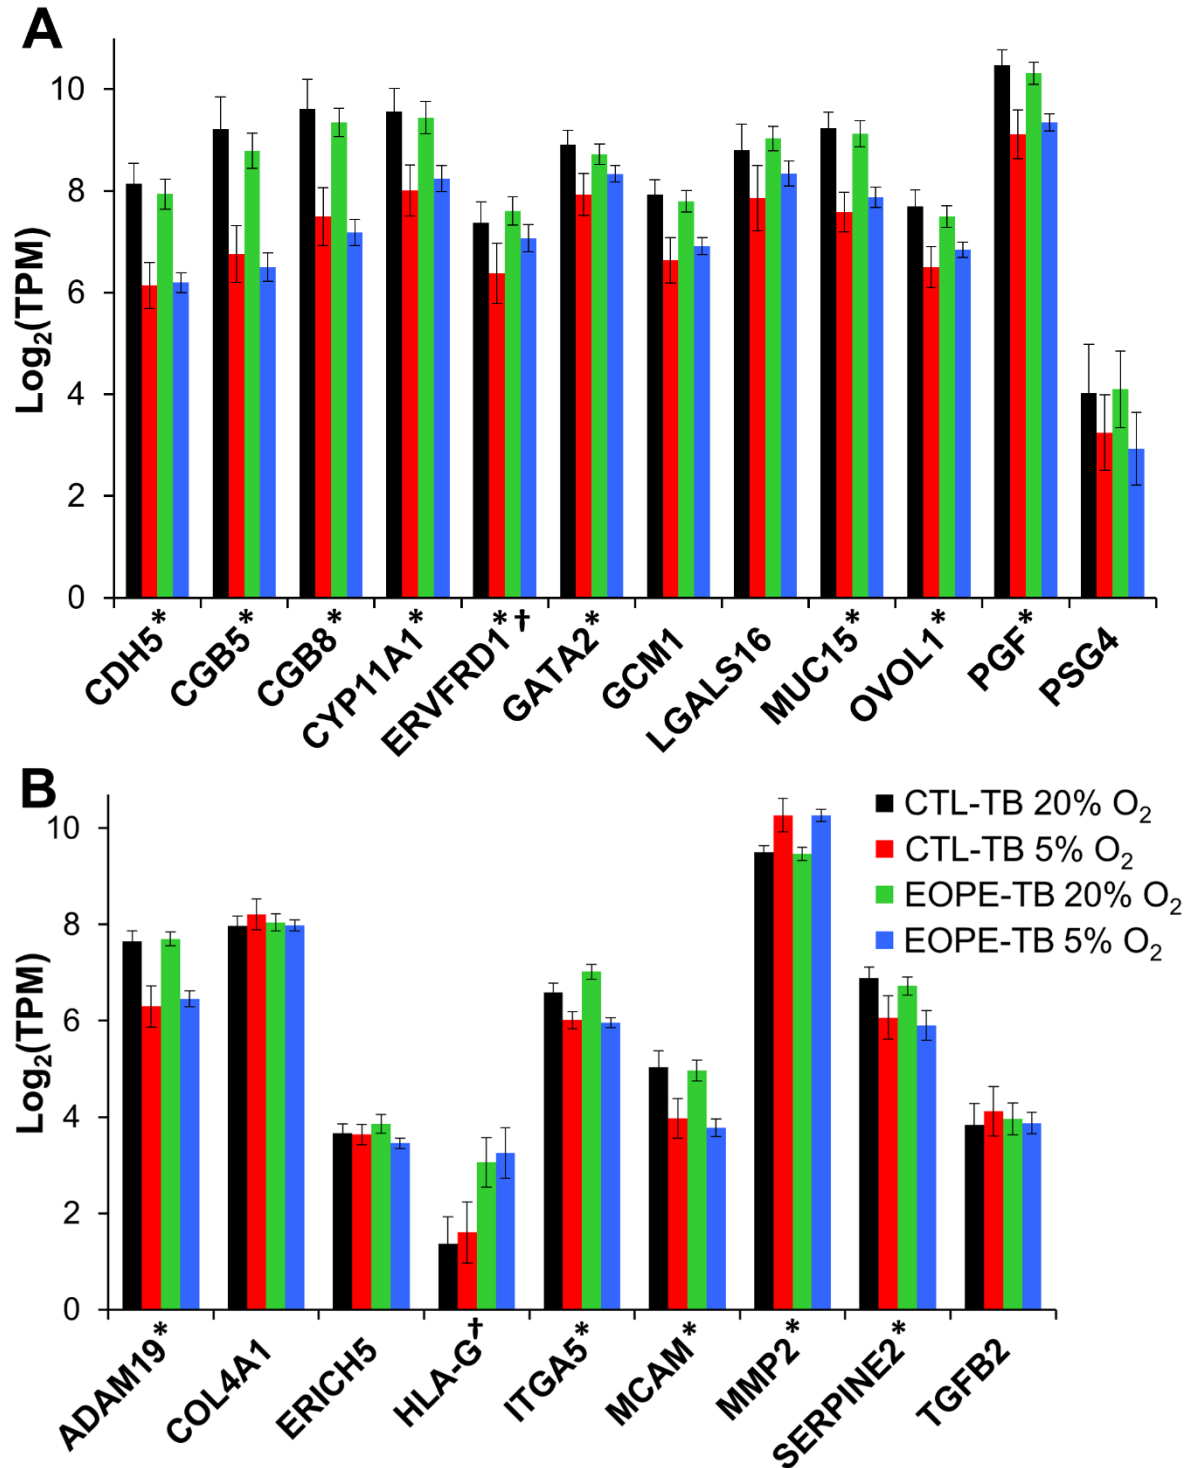

**Fig. S3.** Transcript levels for gene expression markers with typically enriched expression in syncytiotrophoblast (A) and extravillous trophoblast (B) were compared by two-way ANOVA (GraphPad Prism), with disease and oxygen level as factors. Genes marked with \* differed significantly ( $p < 0.05$ ) between 5 and 20 % oxygen. Genes marked with † differed significantly between CTL and EOPE.

## SI Tables

| Sample Name | AMEL | CSF1PO | D13S317 | D16S539 | D18S51   | D19S433    | D21S11     | D2S1338 | D3S1358 | D5S818 | D7S820 | D8S1179 | FGA    | TH01     | TPOX   | vWA    |
|-------------|------|--------|---------|---------|----------|------------|------------|---------|---------|--------|--------|---------|--------|----------|--------|--------|
| H1ESC       | X, Y | 12, 13 | 8, 11   | 9, 13   | 17, 18   | 13, 15     | 18, 32.2   | 18, 19  | 15, 15  | 9, 11  | 8, 12  | 12, 13  | 20, 24 | 9.3, 9.3 | 8, 11  | 15, 17 |
| H9ESC       | X, X | 11, 11 | 9, 9    | 12, 13  | 12.5, 13 | 12, 15     | 30, 30     | 18, 24  | 13, 16  | 11, 12 | 9, 11  | 8, 14   | 26, 28 | 9.3, 9.3 | 10, 11 | 17, 17 |
| uc1p4       | X, Y | 10, 12 | 8, 12   | 10, 11  | 13, 15   | 15, 15.2   | 29, 30     | 18, 20  | 15, 17  | 11, 13 | 8, 9   | 12, 16  | 25, 25 | 9, 9     | 8, 8   | 16, 17 |
| MRuc1i-1p9  | X, Y | 10, 12 | 8, 12   | 10, 11  | 13, 15   | 15, 15.2   | 29, 30     | 18, 20  | 15, 17  | 11, 13 | 8, 9   | 12, 16  | 25, 25 | 9, 9     | 8, 8   | 16, 17 |
| uc3p2       | X, Y | 11, 11 | 8, 10   | 11, 11  | 13, 17   | 12, 13     | 28, 29     | 17, 22  | 16, 16  | 11, 12 | 10, 11 | 13, 16  | 22, 22 | 7, 9.3   | 8, 8   | 16, 17 |
| MRuc3i-7p5  | X, Y | 11, 11 | 8, 10   | 11, 11  | 13, 17   | 12, 13     | 28, 29     | 17, 22  | 16, 16  | 11, 12 | 10, 11 | 13, 16  | 22, 22 | 7, 9.3   | 8, 8   | 16, 17 |
| uc4p2       | X, Y | 10, 12 | 11, 12  | 11, 11  | 13.2, 15 | 12, 15.2   | 28, 28     | 17, 23  | 15, 17  | 11, 11 | 10, 11 | 14, 15  | 21, 24 | 7, 9     | 8, 11  | 16, 17 |
| MRuc4i-13p6 | X, Y | 10, 12 | 11, 12  | 11, 11  | 13.2, 15 | 12, 15.2   | 28, 28     | 17, 23  | 15, 17  | 11, 11 | 10, 11 | 14, 15  | 21, 24 | 7, 9     | 8, 11  | 16, 17 |
| uc5p2       | X, X | 9, 10  | 13, 13  | 9, 10   | 15, 15   | 13, 14     | 28, 30.2   | 25, 26  | 16, 17  | 10, 12 | 9, 11  | 11, 13  | 20, 23 | 9, 9.3   | 8, 8   | 17, 18 |
| MRuc5i-3p4  | X, X | 9, 10  | 13, 13  | 9, 10   | 15, 15   | 13, 14     | 28, 30.2   | 25, 26  | 16, 17  | 10, 12 | 9, 11  | 11, 13  | 20, 23 | 9, 9.3   | 8, 8   | 17, 18 |
| uc6p2       | X, X | 12, 12 | 11, 13  | 10, 12  | 19, 22   | 13, 15     | 29, 31.2   | 19, 19  | 15, 16  | 11, 13 | 11, 13 | 13, 14  | 25, 26 | 6, 7     | 8, 12  | 16, 17 |
| MRuc6i-4p4  | X, X | 12, 12 | 11, 13  | 10, 12  | 19, 22   | 13, 15     | 29, 31.2   | 19, 19  | 15, 16  | 11, 13 | 11, 13 | 13, 14  | 25, 26 | 6, 7     | 8, 12  | 16, 17 |
| uc7p4       | X, Y | 11, 12 | 12, 14  | 11, 13  | 15, 17   | 15.2, 17.2 | 29, 29     | 16, 17  | 16, 19  | 9, 12  | 8, 11  | 13, 13  | 21, 23 | 9, 9.3   | 8, 8   | 17, 19 |
| MRuc7i-1p8  | X, Y | 11, 12 | 12, 14  | 11, 13  | 15, 17   | 15.2, 17.2 | 29, 29     | 16, 17  | 16, 19  | 9, 12  | 8, 11  | 13, 13  | 21, 23 | 9, 9.3   | 8, 8   | 17, 19 |
| uc8p4       | X, X | 10, 11 | 10, 11  | 10, 13  | 12, 17   | 13, 15.2   | 30, 31     | 17, 24  | 14, 18  | 9, 11  | 10, 12 | 10, 11  | 23, 23 | 6, 9.3   | 8, 11  | 16, 17 |
| MRuc8i-1p7  | X, X | 10, 11 | 10, 11  | 10, 13  | 12, 17   | 13, 15.2   | 30, 31     | 17, 24  | 14, 18  | 9, 11  | 10, 12 | 10, 11  | 23, 23 | 6, 9.3   | 8, 11  | 16, 17 |
| uc9p4       | X, X | 11, 12 | 10, 11  | 11, 12  | 12, 19   | 14, 16     | 32.2, 32.2 | 19, 20  | 16, 18  | 10, 13 | 9, 11  | 11, 15  | 18, 24 | 6, 8     | 8, 8   | 17, 18 |
| MRuc9i-2p6  | X, X | 11, 12 | 10, 11  | 11, 12  | 12, 19   | 14, 16     | 32.2, 32.2 | 19, 20  | 16, 18  | 10, 13 | 9, 11  | 11, 15  | 18, 24 | 6, 8     | 8, 8   | 17, 18 |
| uc10p5      | X, Y | 11, 12 | 8, 12   | 12, 13  | 13, 20   | 12, 15     | 30, 30     | 17, 17  | 14, 15  | 11, 12 | 10, 10 | 11, 11  | 23, 25 | 6, 7     | 8, 11  | 15, 17 |
| MRuc10i-5p6 | X, Y | 11, 12 | 8, 12   | 12, 13  | 13, 20   | 12, 15     | 30, 30     | 17, 17  | 14, 15  | 11, 12 | 10, 10 | 11, 11  | 23, 25 | 6, 7     | 8, 11  | 15, 17 |
| ucAp3       | X, X | 9, 12  | 8, 13   | 9, 12   | 13, 17   | 14.2, 15   | 29, 32.2   | 17, 25  | 16, 17  | 12, 12 | 9, 11  | 11, 12  | 20, 22 | 9, 3     | 8, 11  | 18, 19 |
| MRucAi-3p3  | X, X | 9, 12  | 8, 13   | 9, 12   | 13, 17   | 14.2, 15   | 29, 32.2   | 17, 25  | 16, 17  | 12, 12 | 9, 11  | 11, 12  | 20, 22 | 9, 3     | 8, 11  | 18, 19 |
| ucBp4       | X, Y | 10, 12 | 8, 8    | 9, 12   | 13, 14   | 13, 14     | 28, 32.2   | 20, 23  | 16, 17  | 10, 12 | 8, 10  | 12, 14  | 21, 25 | 7, 9     | 8, 9   | 16, 19 |
| MRucBi-1p4  | X, Y | 10, 12 | 8, 8    | 9, 12   | 13, 14   | 13, 14     | 28, 32.2   | 20, 23  | 16, 17  | 10, 12 | 8, 10  | 12, 14  | 21, 25 | 7, 9     | 8, 9   | 16, 19 |
| ucCp1       | X, Y | 11, 12 | 9, 10   | 10, 12  | 19, 21   | 14, 14     | 31.2,      | 19, 23  | 15, 16  | 11, 13 | 12, 13 | 13, 13  | 27, 28 | 6, 9.3   | 9, 12  | 16, 18 |
| MRucCi-2p7  | X, Y | 11, 12 | 9, 10   | 10, 12  | 19, 21   | 14, 14     | 31.2,      | 19, 23  | 15, 16  | 11, 13 | 12, 13 | 13, 13  | 27, 28 | 6, 9.3   | 9, 12  | 16, 18 |
| ucDp4       | X, Y | 10, 11 | 11, 12  | 12, 12  | 14, 15   | 14, 16     | 28, 30     | 16, 17  | 17, 18  | 12, 12 | 9, 10  | 12, 13  | 23, 23 | 9, 9.3   | 8, 12  | 14, 16 |
| MRucDi-1p7  | X, Y | 10, 11 | 11, 12  | 12, 12  | 14, 15   | 14, 16     | 28, 30     | 16, 17  | 17, 18  | 12, 12 | 9, 10  | 12, 13  | 23, 23 | 9, 9.3   | 8, 12  | 14, 16 |
| ucEp1       | X, Y | 12, 13 | 10, 14  | 11, 13  | 17, 17   | 13, 15     | 27, 31     | 17, 18  | 15, 15  | 13, 13 | 8, 9   | 14, 14  | 18, 21 | 8, 9.3   | 12, 12 | 15, 18 |
| MRucEi-6p6  | X, Y | 12, 13 | 10, 14  | 11, 13  | 17, 17   | 13, 15     | 27, 31     | 17, 18  | 15, 15  | 13, 13 | 8, 9   | 14, 14  | 18, 21 | 8, 9.3   | 12, 12 | 15, 18 |
| ucGp4       | X, Y | 11, 13 | 10, 11  | 12, 14  | 14, 15   | 14, 14     | 30, 30.2   | 16, 19  | 14, 15  | 12, 13 | 8, 11  | 9, 13   | 22, 23 | 8, 9     | 10, 11 | 16, 19 |
| MRucGi-3p4  | X, Y | 11, 13 | 10, 11  | 12, 14  | 14, 15   | 14, 14     | 30, 30.2   | 16, 19  | 14, 15  | 12, 13 | 8, 11  | 9, 13   | 22, 23 | 8, 9     | 10, 11 | 16, 19 |
| ucIp4*      | X, Y | 11, 11 | 8, 11   | 11, 12  | 14, 15   | 13, 14     | 29, 29     | 17, 22  | 17, 17  | 11, 13 | 8, 12  | 13, 14  | 19, 24 | 6, 8     | 11, 11 | 16, 18 |
| MRucIi-4p4* | X, Y | 11, 11 | 8, 11   | 11, 12  | 14, 15   | 13, 14     | 29, 29     | 17, 22  | 17, 17  | 11, 13 | 8, 12  | 13, 14  | 19, 24 | 6, 8     | 11, 11 | 16, 18 |
| ucJp4*      | X, Y | 11, 11 | 8, 11   | 11, 12  | 14, 15   | 13, 14     | 29, 29     | 17, 22  | 17, 17  | 11, 13 | 8, 12  | 13, 14  | 19, 24 | 6, 8     | 11, 11 | 16, 18 |
| MRucIi-1p4* | X, Y | 11, 11 | 8, 11   | 11, 12  | 14, 15   | 13, 14     | 29, 29     | 17, 22  | 17, 17  | 11, 13 | 8, 12  | 13, 14  | 19, 24 | 6, 8     | 11, 11 | 16, 18 |
| ucKp2       | X, Y | 10, 11 | 8, 12   | 10, 11  | 13, 16   | 14, 15.2   | 28, 28     | 17, 24  | 15, 15  | 11, 12 | 11, 12 | 12, 14  | 20, 22 | 9.3, 9.3 | 8, 8   | 17, 17 |
| MRucKi-2p3  | X, Y | 10, 11 | 8, 12   | 10, 11  | 13, 16   | 14, 15.2   | 28, 28     | 17, 24  | 15, 15  | 11, 12 | 11, 12 | 12, 14  | 20, 22 | 9.3, 9.3 | 8, 8   | 17, 17 |
| ucLp2       | X, Y | 10, 15 | 8, 11   | 9, 11   | 16, 16   | 13, 14     | 32.2, 32.2 | 17, 18  | 14, 15  | 12, 12 | 10, 12 | 13, 14  | 22, 22 | 6, 7     | 8, 11  | 15, 18 |
| MRucLi-4p13 | X, Y | 10, 15 | 8, 11   | 9, 11   | 16, 16   | 13, 14     | 32.2, 32.2 | 17, 18  | 14, 15  | 12, 12 | 10, 12 | 13, 14  | 22, 22 | 6, 7     | 8, 11  | 15, 18 |
| ucMp4       | X, Y | 10, 12 | 8, 10   | 11, 12  | 16, 18   | 14, 14     | 28, 32.2   | 20, 21  | 16, 18  | 11, 12 | 9, 12  | 8, 15   | 22, 24 | 6, 9     | 8, 9   | 17, 18 |
| MRucMi-4p4  | X, Y | 10, 12 | 8, 10   | 11, 12  | 16, 18   | 14, 14     | 28, 32.2   | 20, 21  | 16, 18  | 11, 12 | 9, 12  | 8, 15   | 22, 24 | 6, 9     | 8, 9   | 17, 18 |
| ucPp2       | X, X | 10, 12 | 11, 12  | 9, 11   | 13, 14   | 14, 14     | 29, 31.2   | 16, 20  | 15, 17  | 13, 13 | 10, 13 | 13, 14  | 19, 22 | 6, 9     | 8, 8   | 16, 17 |
| MRucPi-1p7  | X, X | 10, 12 | 11, 12  | 9, 11   | 13, 14   | 14, 14     | 29, 31.2   | 16, 20  | 15, 17  | 13, 13 | 10, 13 | 13, 14  | 19, 22 | 6, 9     | 8, 8   | 16, 17 |
| ucQp4       | X, X | 11, 12 | 8, 12   | 13, 14  | 13, 17   | 13, 15     | 30, 30     | 18, 23  | 16, 18  | 9, 11  | 9, 10  | 8, 11   | 20, 25 | 7, 10    | 8, 11  | 17, 20 |
| MRucQi-15p4 | X, X | 11, 12 | 8, 12   | 13, 14  | 13, 17   | 13, 15     | 30, 30     | 18, 23  | 16, 18  | 9, 11  | 9, 10  | 8, 11   | 20, 25 | 7, 10    | 8, 11  | 17, 20 |
| ucRp2       | X, X | 11, 11 | 9, 9    | 11, 13  | 13, 17   | 13, 14     | 29, 32.2   | 17, 23  | 14, 17  | 11, 12 | 11, 12 | 13, 14  | 19, 24 | 6, 6     | 8, 11  | 18, 18 |
| MRucRi-7p4  | X, X | 11, 11 | 9, 9    | 11, 13  | 13, 17   | 13, 14     | 29, 32.2   | 17, 23  | 14, 17  | 11, 12 | 11, 12 | 13, 14  | 19, 24 | 6, 6     | 8, 11  | 18, 18 |
| ucS**       | X, X | 10, 12 | 11, 12  | 9, 9    | 16, 18   | 14.2, 16.2 | 28, 31.2   | 23, 25  | 14, 15  | 11, 12 | 14, 14 | 12, 13  | 22, 26 | 7, 9     | 11, 11 | 14, 15 |
| MRucSi-4p3  | X, X | 10, 12 | 11, 12  | 9, 9    | 16, 18   | 14.2, 16.2 | 28, 31.2   | 23, 25  | 14, 15  | 11, 12 | 14, 14 | 12, 13  | 22, 26 | 7, 9     | 11, 11 | 14, 15 |

**Table S1.** Related to Figures 1-5 and Table 1. Short tandem repeat (STR) profiling for hESC lines (H1 and H9) and cell lines derived from explants of umbilical cords (uc) before and after conversion to iPSC. The parental primary cells are numbered 1-10 for CTL lines and A-S for EOPE lines (see Table 1). The number following the lower case “p” is the passage number at which the analysis was performed. The iPSC lines were named according to convention (laboratory, MR; tissue source, uc; cell line designation, 1-10 CTL and A-S EOPE; iPSC clone number, e.g, i-4; and p, passage number). The STR multiplex assay amplifies the Amelogenin (AMEL) sex-determining marker and 15 tetranucleotide repeat loci. Note that the original primary explant cells and the iPSC lines derived from them invariably show identical STR patterns. \* Two PE samples I and J were from monozygotic twin boys (Table 1). As expected, both their

explant cells (ucI and ucJ) and the two iPSC lines (MRucIi and MRucJi) showed identical STR patterns. \*\*  
The genomic DNA of ucS was collected from umbilical cord tissue.

| CTL ESC & iPSC |           |         |        | EOPE iPSC   |           |         |                  |
|----------------|-----------|---------|--------|-------------|-----------|---------|------------------|
| Sample ID      | Pluri-raw | Novelty | Result | Sample ID   | Pluri-raw | Novelty | Result           |
| H1 ESC         | 24.534    | 1.599   | Pass   | MRucAi-3p7  | 29.713    | 1.341   | Pass             |
| MRuc1i-1p10    | 28.507    | 1.532   | Pass   | MRucBi-1p14 | 20.232    | 1.488   | Pass             |
| MRuc2i-4p4     | 25.03     | 1.188   | Pass   | MRucCi-2p7  | 22.641    | 1.383   | Pass             |
| MRuc3i-7p5     | 29.419    | 1.505   | Pass   | MRucDi-5p8  | 25.081    | 1.489   | Pass             |
| MRuc4i-2p7     | 20.256    | 1.523   | Pass   | MRucEi-6p6  | 24.347    | 1.499   | Pass             |
| MRuc5i-3p8     | 29.55     | 1.35    | Pass   | MRucFi-4p9  | 25.419    | 1.377   | Pass             |
| MRuc6i-4p4     | 28.943    | 1.382   | Pass   | MRucGi-3p4  | 20.139    | 1.429   | Pass             |
| MRuc7i-1p9     | 20.688    | 1.263   | Pass   | MRucHi-5p5  | 20.498    | 1.63    | Pass             |
| MRuc8i-1p7     | 20.302    | 1.172   | Pass   | MRucIi-4p4  | 20.911    | 1.338   | Pass             |
| MRuc9i-2p6     | 29.92     | 1.492   | Pass   | MRucJi-1p4  | 24.897    | 1.397   | Pass             |
| MRuc10i-5p7    | 25.13     | 1.23    | Pass   | MRucKi-2p5  | 22.107    | 1.378   | Pass             |
|                |           |         |        | MRucLi-4p17 | 21.096    | 1.621   | Pass             |
|                |           |         |        | MRucMi-4p11 | 26.203    | 1.687   | Further evaluate |
|                |           |         |        | MRucNi-3p7  | 29.503    | 1.628   | Pass             |
|                |           |         |        | MRucOi-2p5  | 23.775    | 1.573   | Pass             |
|                |           |         |        | MRucPi-1p7  | 27.218    | 1.253   | Pass             |
|                |           |         |        | MRucQi-6p7  | 25.637    | 1.458   | Pass             |
|                |           |         |        | MRucRi-7p3  | 34.4      | 1.45    | Pass             |
|                |           |         |        | MRucSi-4p16 | 18.566    | 1.361   | Further evaluate |

**Table S2.** Related to Figures 1-5 and Table 1. Pluritest scores and Pluritest assessments for CTL iPSC (left) and EOPE iPSC (right). The cell line name (explanation in legend for Table S1) is accompanied with the clone number and with the passage (p) number when the RNA was prepared. Slightly deviant scores but within the range considered to represent pluripotency are in red font. High quality pluripotent lines have a Pluri-raw Score  $\geq 20$  and a Novelty Score of  $\leq 1.67$  (<https://pluritest.org/>).

| Sample # | Cell Line | Clinical Condition | Sex | O <sub>2</sub> % | # Raw Reads | % Alignment |
|----------|-----------|--------------------|-----|------------------|-------------|-------------|
| 1        | H1 WA01   | CTL                | M   | 5                | 9544478     | 97.78%      |
| 2        | H1 WA01   | CTL                | M   | 20               | 8487826     | 98%         |
| 3        | H9 WA09   | CTL                | F   | 5                | 9923104     | 97.83%      |
| 4        | H9 WA09   | CTL                | F   | 20               | 8754450     | 97.75%      |
| 5        | MRuc3i    | CTL                | M   | 5                | 8354043     | 97.81%      |
| 6        | MRuc3i    | CTL                | M   | 20               | 9930415     | 97.94%      |
| 7        | MRuc4i    | CTL                | M   | 5                | 8457322     | 97.96%      |
| 8        | MRuc4i    | CTL                | M   | 20               | 9306064     | 97.78%      |
| 9        | MRuc5i    | CTL                | F   | 5                | 10178388    | 97.77%      |
| 10       | MRuc5i    | CTL                | F   | 20               | 9089732     | 97.94%      |
| 11       | MRuc6i    | CTL                | M   | 5                | 10142239    | 97.82%      |
| 12       | MRuc6i    | CTL                | M   | 20               | 8804329     | 97.69%      |
| 13       | MRuc7i    | CTL                | M   | 5                | 10036158    | 97.78%      |
| 14       | MRuc7i    | CTL                | M   | 20               | 9837780     | 97.80%      |
| 15       | MRuc8i    | CTL                | F   | 5                | 10859080    | 97.87%      |
| 16       | MRuc8i    | CTL                | F   | 20               | 10138845    | 97.73%      |
| 17       | MRuc9i    | CTL                | F   | 5                | 9852303     | 97.73%      |
| 18       | MRuc9i    | CTL                | F   | 20               | 8432784     | 97.64%      |
| 19       | MRuc10i   | CTL                | F   | 5                | 10146448    | 97.71%      |
| 20       | MRuc10i   | CTL                | F   | 20               | 9170474     | 97.86%      |
| 21       | MRucAi    | EOPE               | F   | 5                | 8943860     | 98.03%      |
| 22       | MRucAi    | EOPE               | F   | 20               | 9514962     | 97.90%      |
| 23       | MRucBi    | EOPE               | M   | 5                | 9940119     | 97.95%      |
| 24       | MRucBi    | EOPE               | M   | 20               | 9066300     | 97.94%      |
| 25       | MRucDi    | EOPE               | M   | 5                | 8782427     | 97.52%      |
| 26       | MRucDi    | EOPE               | M   | 20               | 8615882     | 98.08%      |
| 27       | MRucEi    | EOPE               | M   | 5                | 6593496     | 97.76%      |
| 28       | MRucEi    | EOPE               | M   | 20               | 8842144     | 97.87%      |
| 29       | MRucGi    | EOPE               | M   | 5                | 8628925     | 97.96%      |
| 30       | MRucGi    | EOPE               | M   | 20               | 9657760     | 98.01%      |
| 31       | MRucli    | EOPE               | M   | 5                | 9436505     | 97.81%      |
| 32       | MRucli    | EOPE               | M   | 20               | 9570690     | 97.87%      |
| 33       | MRucJi    | EOPE               | M   | 5                | 6614438     | 97.90%      |
| 34       | MRucJi    | EOPE               | M   | 20               | 7461183     | 97.96%      |
| 35       | MRucKi    | EOPE               | M   | 5                | 8020706     | 97.84%      |
| 36       | MRucKi    | EOPE               | M   | 20               | 7002708     | 97.74%      |
| 37       | MRucLi    | EOPE               | M   | 5                | 7288412     | 97.84%      |
| 38       | MRucLi    | EOPE               | M   | 20               | 7690860     | 97.86%      |
| 39       | MRucMi    | EOPE               | M   | 5                | 8016411     | 97.8%       |
| 40       | MRucMi    | EOPE               | M   | 20               | 7151914     | 97.85%      |
| 41       | MRucPi    | EOPE               | F   | 5                | 8102036     | 97.66%      |
| 42       | MRucPi    | EOPE               | F   | 20               | 8245633     | 97.77%      |
| 43       | MRucQi    | EOPE               | F   | 5                | 8751919     | 97.84%      |
| 44       | MRucQi    | EOPE               | F   | 20               | 9053055     | 97.82%      |
| 45       | MRucRi    | EOPE               | F   | 5                | 8855108     | 97.73%      |
| 46       | MRucRi    | EOPE               | F   | 20               | 10245320    | 97.68%      |
| 47       | MRucSi    | EOPE               | F   | 5                | 9581929     | 97.67%      |
| 48       | MRucSi    | EOPE               | F   | 20               | 6043823     | 97.67%      |

**Table S3.** Related to Figures 4 and 5. Raw read counts and overall alignment for each sample of RNA analyzed. A total of 48 RNAseq samples were analyzed by NextSeq 500 (Illumina).



| Replicate #      | 1                 | 2    | 3    | 4   | ave  | std | 1                  | 2    | 3    | 4   | ave  | std | P value |
|------------------|-------------------|------|------|-----|------|-----|--------------------|------|------|-----|------|-----|---------|
| Cell line        | 5% O <sub>2</sub> |      |      |     |      |     | 20% O <sub>2</sub> |      |      |     |      |     |         |
| <b>H1</b>        | 543               | 654  | 638  |     | 612  | 60  | 561                | 616  | 508  |     | 562  | 54  | 0.344   |
| <b>H9</b>        | 1435              | 1696 | 2551 |     | 1894 | 584 | 1987               | 1536 | 1365 |     | 1629 | 322 | 0.529   |
| <i>MRuc3i-7</i>  | 1121              | 990  | 1217 |     | 1109 | 114 | 928                | 1103 | 1077 |     | 1036 | 94  | 0.438   |
| <i>MRuc4i-2</i>  | 205               | 389  | 500  |     | 365  | 149 | 122                | 290  | 181  | 262 | 214  | 77  | 0.136   |
| <i>MRuc5i-3</i>  | 474               | 464  | 556  |     | 498  | 51  | 397                | 429  | 522  |     | 449  | 65  | 0.365   |
| <i>MRuc6i-4</i>  | 257               | 596  | 1009 | 295 | 539  | 348 | 399                | 659  | 583  |     | 547  | 134 | 0.971   |
| <i>MRuc7i-1</i>  | 294               | 505  | 592  | 595 | 496  | 141 | 465                | 313  | 329  |     | 369  | 84  | 0.229   |
| <i>MRuc8i-1</i>  | 649               | 559  | 625  |     | 611  | 47  | 609                | 485  | 532  |     | 542  | 62  | 0.200   |
| <i>MRuc9i-2</i>  | 360               | 871  | 313  |     | 515  | 309 | 18                 | 28   | 179  |     | 75   | 90  | 0.078   |
| <i>MRuc10i-5</i> | 153               | 49   | 115  |     | 79   | 68  | 122                | 95   | 69   |     | 71   | 52  | 0.772   |
| <i>MRucAi-3</i>  | 181               | 138  | 122  |     | 147  | 30  | 26                 | 10   | 17   |     | 18   | 8   | 0.002   |
| <i>MRucBi-1</i>  | 561               | 633  | 489  |     | 561  | 72  | 134                | 204  | 163  |     | 167  | 36  | 0.001   |
| <i>MRucDi-5</i>  | 740               | 561  | 431  |     | 577  | 155 | 271                | 311  | 378  |     | 320  | 54  | 0.054   |
| <i>MRucEi-6</i>  | 510               | 647  | 518  | 505 | 545  | 69  | 135                | 153  | 192  | 202 | 170  | 32  | 0.000   |
| <i>MRucGi-3</i>  | 328               | 423  | 515  |     | 316  | 224 | 177                | 197  | 296  |     | 167  | 123 | 0.038   |
| <i>MRucIi-4</i>  | 28                | 33   | 30   |     | 23   | 15  | 8                  | 10   | 13   |     | 8    | 5   | 0.000   |
| <i>MRucJi-1</i>  | 314               | 348  | 302  |     | 321  | 24  | 95                 | 140  | 124  |     | 120  | 23  | 0.000   |
| <i>MRucKi-2</i>  | 2130              | 868  | 1230 |     | 1409 | 650 | 217                | 458  | 395  |     | 357  | 125 | 0.051   |
| <i>MRucLi-4</i>  | 78                | 95   | 62   |     | 78   | 17  | 19                 | 36   | 12   |     | 22   | 12  | 0.009   |
| <i>MRucMi-4</i>  | 566               | 531  | 670  |     | 589  | 72  | 214                | 254  | 186  |     | 218  | 34  | 0.001   |
| <i>MRucPi-1</i>  | 250               | 212  | 240  |     | 234  | 20  | 102                | 50   | 75   |     | 76   | 26  | 0.001   |
| <i>MRucQi-6</i>  | 1707              | 1142 | 937  |     | 1262 | 399 | 1454               | 2026 | 1094 |     | 1525 | 470 | 0.501   |
| <i>MRucRi-7</i>  | 1789              | 1411 | 1636 |     | 1612 | 190 | 33                 | 84   | 130  |     | 83   | 49  | 0.000   |
| <i>MRucSi-4</i>  | 585               | 758  | 556  |     | 633  | 109 | 234                | 265  | 129  |     | 209  | 71  | 0.005   |

  

|                                            |  |
|--------------------------------------------|--|
| Non-Significant ( $P > 0.05$ )             |  |
| Almost Significant ( $P = 0.051 - 0.055$ ) |  |
| Significant ( $P < 0.05$ )                 |  |

**Table S4.** Related to Figure 2. Invaded cell numbers for 10 CTL (upper, gray) and 14 EOPE lines (lower, beige) after differentiation under BAP conditions for 6 days. Data are summarized in Fig. 3. The cell numbers are derived from either three or four independent experiments, each performed in triplicate invasion chamber wells. These values were averaged (ave), the standard deviation (std) calculated according to whether the cells had been cultured under 5 % O<sub>2</sub> (left) or 20 % O<sub>2</sub> (right). Significance of pairwise comparisons (5 % vs 20 % O<sub>2</sub>) is highlighted (non-significant  $P > 0.05$ : green, almost significant  $P = 0.051 - 0.055$ : yellow, significant  $P < 0.05$ : brown).

| EOPE vs. CTL                                        | Upregulated in EOPE | Upregulated in CTL                                                 |
|-----------------------------------------------------|---------------------|--------------------------------------------------------------------|
| EOPE 20 % O <sub>2</sub> vs. CTL 20% O <sub>2</sub> | 0                   | 2<br>( <i>RPS17</i> , FDR = 0.0005; <i>MTRNR2L2</i> , FDR = 0.005) |
| EOPE 5 % O <sub>2</sub> vs. CTL 5 % O <sub>2</sub>  | 0                   | 0                                                                  |

**Table S5.** Related to Figures 4 and 5. Summary of the differential expression analysis between the CTL and EOPE samples across the two different O<sub>2</sub> conditions. Genes with a p-adjusted  $\leq 0.05$  and fold-change  $\geq 1.5$  were considered differentially expressed.

| <b>Gene</b>      | <b>K<sub>ME</sub>-score</b> | <b>Correlation</b> | <b>P value</b> | <b>adjusted p value</b> |
|------------------|-----------------------------|--------------------|----------------|-------------------------|
| <b>NEURL1</b>    | 0.99166957                  | -0.6411007         | 0.00744369     | 0.02560337              |
| <b>FDX1</b>      | 0.99091683                  | -0.6083999         | 0.01239258     | 0.02947238              |
| <b>PRKCZ</b>     | 0.99086532                  | -0.6447414         | 0.00700842     | 0.02558895              |
| <b>SPIRE2</b>    | 0.98841279                  | -0.603806          | 0.01325637     | 0.03046182              |
| <b>FURIN</b>     | 0.98831897                  | -0.6497263         | 0.00644554     | 0.02558895              |
| <b>DIRC2</b>     | 0.9863337                   | -0.6096594         | 0.01216364     | 0.02923006              |
| <b>CARS</b>      | 0.98631635                  | -0.6653172         | 0.00491341     | 0.02390458              |
| <b>CD274</b>     | 0.98279084                  | -0.6312065         | 0.00873579     | 0.02621377              |
| <b>KLB</b>       | 0.98272879                  | -0.620513          | 0.01032544     | 0.02719032              |
| <b>TOP1</b>      | 0.98155635                  | -0.6738276         | 0.00420953     | 0.02390458              |
| <b>HSD17B1</b>   | 0.9811725                   | -0.6489189         | 0.00653418     | 0.02558895              |
| <b>FHDC1</b>     | 0.97970679                  | -0.60061           | 0.01388462     | 0.03148952              |
| <b>GLTP</b>      | 0.97951539                  | -0.6153631         | 0.01116816     | 0.02835914              |
| <b>SDC1</b>      | 0.9793054                   | -0.615697          | 0.01111192     | 0.02835914              |
| <b>RASA1</b>     | 0.97922142                  | -0.6120512         | 0.01173806     | 0.02877848              |
| <b>DACT2</b>     | 0.97892185                  | -0.5898711         | 0.01616774     | 0.03341645              |
| <b>HSPB1</b>     | 0.97828964                  | -0.65382           | 0.00601074     | 0.0254383               |
| <b>EIF2B2</b>    | 0.97814308                  | -0.6515325         | 0.00625071     | 0.02558895              |
| <b>FBR3</b>      | 0.97793016                  | -0.7116555         | 0.00198867     | 0.02390458              |
| <b>LOC113230</b> | 0.97781417                  | -0.6107899         | 0.011961       | 0.02915451              |
| <b>SIN3B</b>     | 0.97725403                  | -0.6377227         | 0.00786649     | 0.02564547              |
| <b>FLVCR2</b>    | 0.97718879                  | -0.6707064         | 0.00445759     | 0.02390458              |
| <b>PVRL3</b>     | 0.97691328                  | -0.662831          | 0.00513589     | 0.02436061              |
| <b>ATP2B4</b>    | 0.97677145                  | -0.5853696         | 0.01720742     | 0.03460592              |
| <b>KCNN4</b>     | 0.9767095                   | -0.6300196         | 0.008902       | 0.02621377              |
| <b>CYP11A1</b>   | 0.97621394                  | -0.6763923         | 0.0040141      | 0.02390458              |
| <b>NR2F6</b>     | 0.97596883                  | -0.703291          | 0.00236981     | 0.02390458              |
| <b>STK40</b>     | 0.97590351                  | -0.6305614         | 0.00882582     | 0.02621377              |
| <b>MAST4</b>     | 0.97371456                  | -0.6364498         | 0.00803066     | 0.02564547              |
| <b>HSPB8</b>     | 0.9735902                   | -0.6796668         | 0.00377525     | 0.02390458              |
| <b>MAN1A2</b>    | 0.97339963                  | -0.5947613         | 0.0150944      | 0.03263461              |
| <b>ABHD5</b>     | 0.97338435                  | -0.5999523         | 0.01401674     | 0.03148952              |

|                 |            |            |            |            |
|-----------------|------------|------------|------------|------------|
| <b>HOPX</b>     | 0.97314074 | -0.5672509 | 0.02192745 | 0.03840005 |
| <b>HDAC5</b>    | 0.97303063 | -0.7028993 | 0.00238901 | 0.02390458 |
| <b>WNK2</b>     | 0.97297518 | -0.6512691 | 0.00627882 | 0.02558895 |
| <b>RPS6KA5</b>  | 0.97205721 | -0.6078925 | 0.01248576 | 0.02947238 |
| <b>FAR2</b>     | 0.97178342 | -0.579826  | 0.01855837 | 0.03585598 |
| <b>RAP1B</b>    | 0.97158959 | -0.6125698 | 0.01164734 | 0.02865488 |
| <b>HES2</b>     | 0.97148598 | -0.5997961 | 0.01404826 | 0.03148952 |
| <b>EPHB4</b>    | 0.97130053 | -0.6488553 | 0.0065412  | 0.02558895 |
| <b>C10orf10</b> | 0.97129963 | -0.6227831 | 0.00997028 | 0.02716041 |
| <b>SLC38A3</b>  | 0.97125717 | -0.6155016 | 0.0111448  | 0.02835914 |
| <b>FADS3</b>    | 0.97102879 | -0.5384711 | 0.03140453 | 0.04781289 |
| <b>PPARD</b>    | 0.97005064 | -0.6909845 | 0.00303616 | 0.02390458 |
| <b>TGFBR3</b>   | 0.9700302  | -0.6266532 | 0.00938708 | 0.02669685 |
| <b>SLC9A1</b>   | 0.96925952 | -0.6567301 | 0.00571613 | 0.02540107 |
| <b>DNAJB9</b>   | 0.96924202 | -0.6314663 | 0.00869974 | 0.02621377 |
| <b>CYP2C18</b>  | 0.96921708 | -0.6135383 | 0.01147941 | 0.02849609 |
| <b>DYSF</b>     | 0.96885228 | -0.6298209 | 0.00893008 | 0.02621377 |
| <b>ABTB2</b>    | 0.96884381 | -0.6234473 | 0.00986822 | 0.02708997 |
| <b>RHOV</b>     | 0.96847483 | -0.6880178 | 0.00321749 | 0.02390458 |
| <b>FANCE</b>    | 0.96756867 | -0.6678152 | 0.00469771 | 0.02390458 |
| <b>KIAA0040</b> | 0.96729316 | -0.6487824 | 0.00654926 | 0.02558895 |
| <b>PDIA3</b>    | 0.96725717 | -0.5356062 | 0.03249534 | 0.04905347 |
| <b>DUSP8</b>    | 0.96698369 | -0.6358387 | 0.00811045 | 0.02564547 |
| <b>TFCP2L1</b>  | 0.96690281 | -0.6235222 | 0.00985676 | 0.02708997 |
| <b>SMAD7</b>    | 0.96621996 | -0.6906892 | 0.00305383 | 0.02390458 |
| <b>ZFH3</b>     | 0.96539458 | -0.6825858 | 0.00357209 | 0.02390458 |
| <b>TNFRSF1B</b> | 0.96534737 | -0.6206727 | 0.01030014 | 0.02719032 |
| <b>PREX1</b>    | 0.96526445 | -0.5000356 | 0.04856169 | 0.06261643 |
| <b>CD200</b>    | 0.96498495 | -0.5472816 | 0.02822382 | 0.04459364 |
| <b>HSPBAP1</b>  | 0.96410273 | -0.6831032 | 0.00353702 | 0.02390458 |
| <b>TMEM180</b>  | 0.96380099 | -0.7130433 | 0.00193055 | 0.02390458 |
| <b>AKR1B1</b>   | 0.96354796 | -0.5410392 | 0.03045058 | 0.0469639  |
| <b>DAB2</b>     | 0.96326738 | -0.6597813 | 0.00541974 | 0.0250223  |

|                |            |            |            |            |
|----------------|------------|------------|------------|------------|
| <b>FAM129B</b> | 0.96290069 | -0.6137791 | 0.01143795 | 0.02849609 |
| <b>NUS1</b>    | 0.96282667 | -0.7104303 | 0.00204115 | 0.02390458 |
| <b>ETV4</b>    | 0.96271108 | -0.6181707 | 0.01070228 | 0.02787297 |
| <b>QSOX1</b>   | 0.96261213 | -0.5982472 | 0.01436387 | 0.03161829 |
| <b>PWWP2B</b>  | 0.96252792 | -0.7145294 | 0.00186984 | 0.02390458 |
| <b>IGSF5</b>   | 0.96213923 | -0.5147032 | 0.04134703 | 0.05620982 |
| <b>OPN3</b>    | 0.9618784  | -0.5769319 | 0.01929558 | 0.03629407 |
| <b>ADCY5</b>   | 0.9614719  | -0.5055396 | 0.04575245 | 0.06057727 |
| <b>ATG9B</b>   | 0.96076855 | -0.590457  | 0.01603608 | 0.03327293 |
| <b>SNX27</b>   | 0.96050103 | -0.565159  | 0.02253082 | 0.0390061  |
| <b>RYBP</b>    | 0.9603951  | -0.686237  | 0.00333046 | 0.02390458 |
| <b>CGA</b>     | 0.96031027 | -0.5140306 | 0.04165912 | 0.0563616  |
| <b>TBX3</b>    | 0.95991503 | -0.6750475 | 0.00411564 | 0.02390458 |
| <b>TIPARP</b>  | 0.95973179 | -0.6439204 | 0.00710476 | 0.02558895 |
| <b>HPCAL1</b>  | 0.95954664 | -0.6799469 | 0.00375536 | 0.02390458 |
| <b>PPM1D</b>   | 0.95899303 | -0.7106327 | 0.00203241 | 0.02390458 |
| <b>SEMA7A</b>  | 0.95895385 | -0.646545  | 0.00680043 | 0.02558895 |
| <b>KMT2C</b>   | 0.95869919 | -0.6941591 | 0.00285135 | 0.02390458 |
| <b>KHK</b>     | 0.95844973 | -0.5632021 | 0.0231068  | 0.03917643 |
| <b>AFF1</b>    | 0.95839151 | -0.6547746 | 0.00591279 | 0.0254383  |
| <b>ZNF845</b>  | 0.9582506  | -0.6816408 | 0.00363688 | 0.02390458 |
| <b>EGFL7</b>   | 0.95814564 | -0.5765623 | 0.01939133 | 0.03637793 |
| <b>RRBP1</b>   | 0.95814532 | -0.5420523 | 0.03008041 | 0.04649385 |
| <b>GMPPB</b>   | 0.95784947 | -0.6050624 | 0.01301558 | 0.03014357 |
| <b>CPEB4</b>   | 0.95783445 | -0.6753486 | 0.00409273 | 0.02390458 |
| <b>FAM83G</b>  | 0.95755978 | -0.613666  | 0.01145739 | 0.02849609 |
| <b>RHOBTB1</b> | 0.95709274 | -0.669073  | 0.004592   | 0.02390458 |
| <b>GNE</b>     | 0.95684241 | -0.6882198 | 0.00320488 | 0.02390458 |
| <b>OTUB2</b>   | 0.95651532 | -0.5979943 | 0.01441591 | 0.03162062 |
| <b>HEXIM1</b>  | 0.95644364 | -0.7719927 | 0.00045862 | 0.02390458 |
| <b>PHLPP1</b>  | 0.95617519 | -0.6775982 | 0.00392477 | 0.02390458 |
| <b>EPPK1</b>   | 0.9558326  | -0.6806944 | 0.0037027  | 0.02390458 |
| <b>SIAH1</b>   | 0.95559814 | -0.6211877 | 0.01021886 | 0.02719032 |

|               |            |            |            |            |
|---------------|------------|------------|------------|------------|
| <b>BAIAP2</b> | 0.9555462  | -0.642037  | 0.00732975 | 0.02558895 |
| <b>ADCK2</b>  | 0.95542233 | -0.5287028 | 0.03524191 | 0.05082556 |

**Table S6.** *Related to Figure 2.* The top 100 genes sorted by their module membership values ( $K_{ME}$ ) in the CTL9 module. The correlation values associated with the corresponding invasion potential are listed as well as the p value and adjusted p value.
